# Supplementary material for: Effects of surface chemical potentials on cation segregation
Source: Royal Society of Chemistry journal article supplement (doi:10.1039/d0ta08850a), 2020-12-14
Supplement: d0ta08850a1.pdf [file d0ta08850a1.pdf]

## Electronic Supporting Information

### Effects of Surface Chemical Potentials on Cation Segregation

Yevgeniy Ostrovskiy,<sup>a,b</sup> Yi-Lin Huang,<sup>a,b\*</sup> and Eric D. Wachsman<sup>a,b\*</sup>

<sup>a</sup>Maryland Energy Innovation Institute, University of Maryland, College Park, MD, 20742

<sup>b</sup>Department of Materials Science & Engineering, University of Maryland, College Park, MD, 20742

\*Corresponding author email: [yilin@umd.edu](mailto:yilin@umd.edu); [ewach@umd.edu](mailto:ewach@umd.edu)

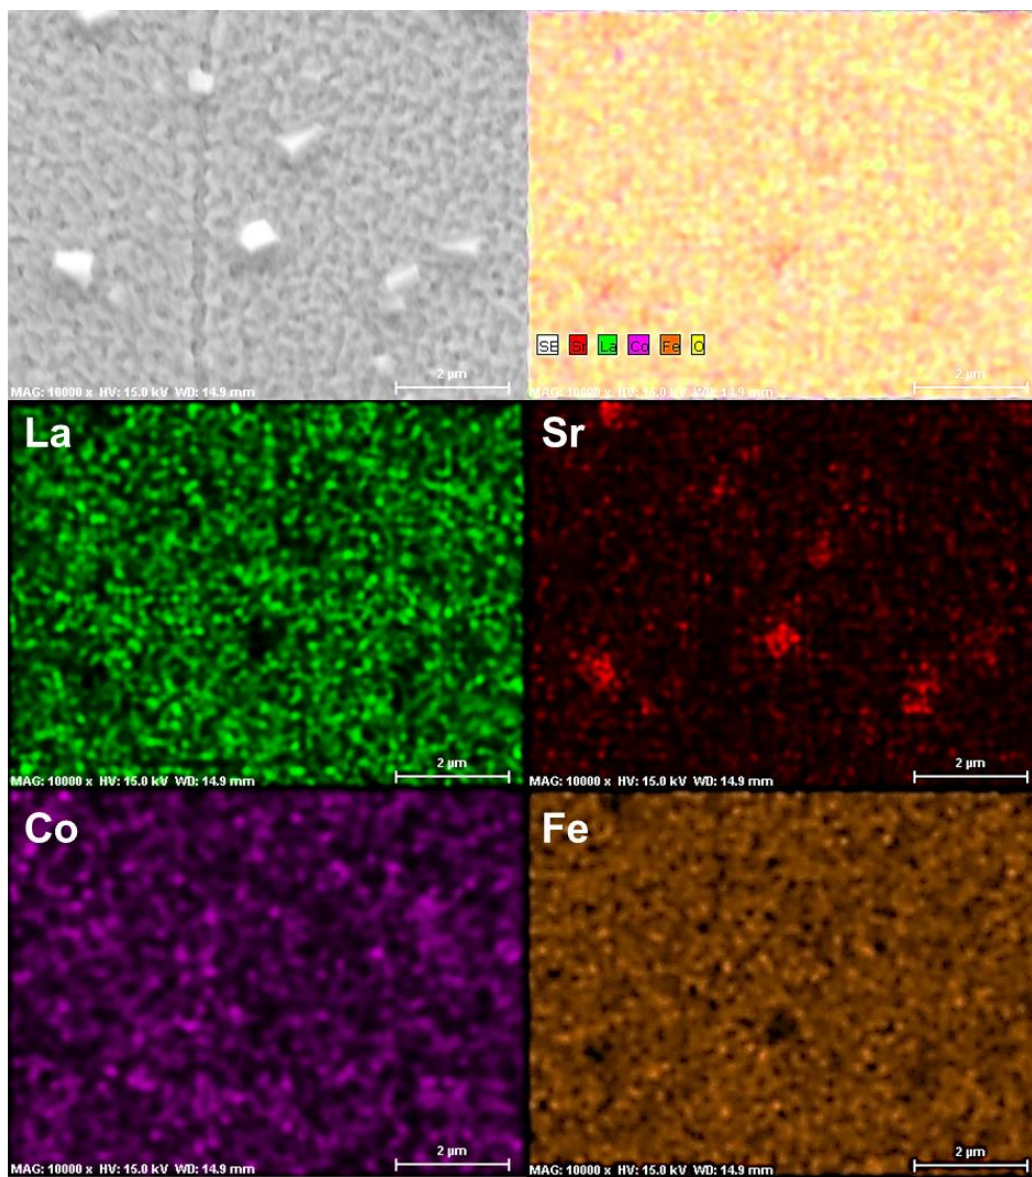

**Fig. S1** EDS on LSCF after aging for 25 hours at 850°C in synthetic air, showing that the main composition of segregated particles is strontium.

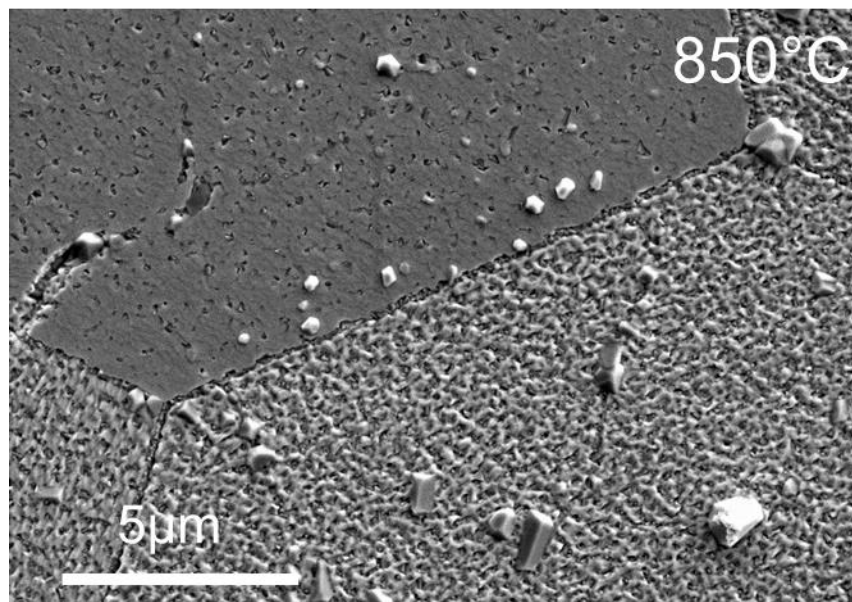

**Fig. S2** SEM of LSCF aged for 25 hours at 850°C in synthetic air, showing the high level of surface degradation

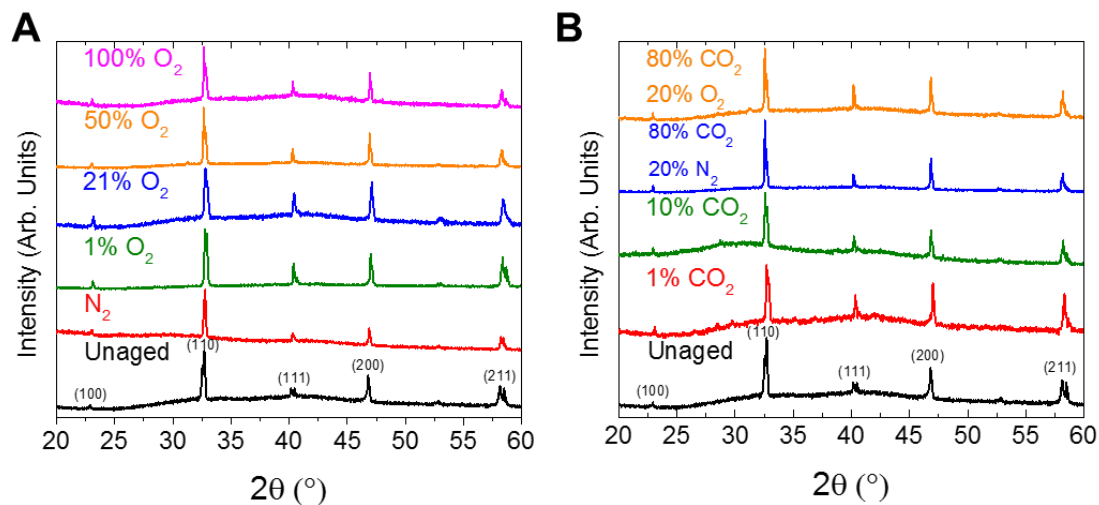

**Fig. S3** XRD of pristine LSCF surface and aged at 700°C for 25 hours in each gas environment. (a) Different oxygen partial pressures: 100%  $O_2$ , 50%  $O_2$ , 21%  $O_2$ , 1%  $O_2$ , 100%  $N_2$ . (b) Different carbon dioxide oxygen partial pressures: 80%  $CO_2$  / 20%  $O_2$ , 80%  $CO_2$  / 20%  $N_2$ , 10%  $CO_2$  / 20%  $O_2$ , 70%  $N_2$ , and 1%  $CO_2$  / 20%  $O_2$ , 79%  $N_2$ .

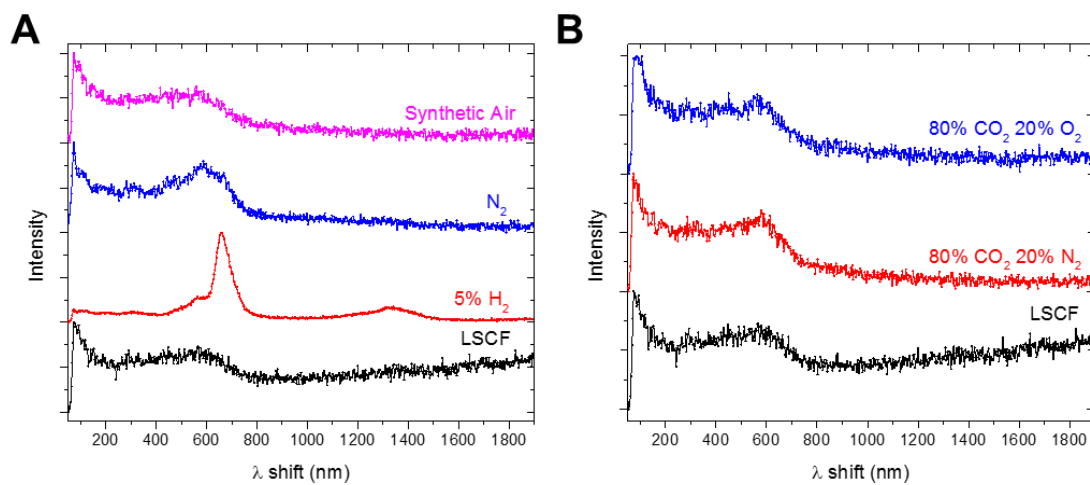

**Fig. S4** Raman spectroscopy of pristine LSCF surface and aged for 25 hours at 700°C in each gas environment (a) without  $CO_2$  (b) with  $CO_2$ .

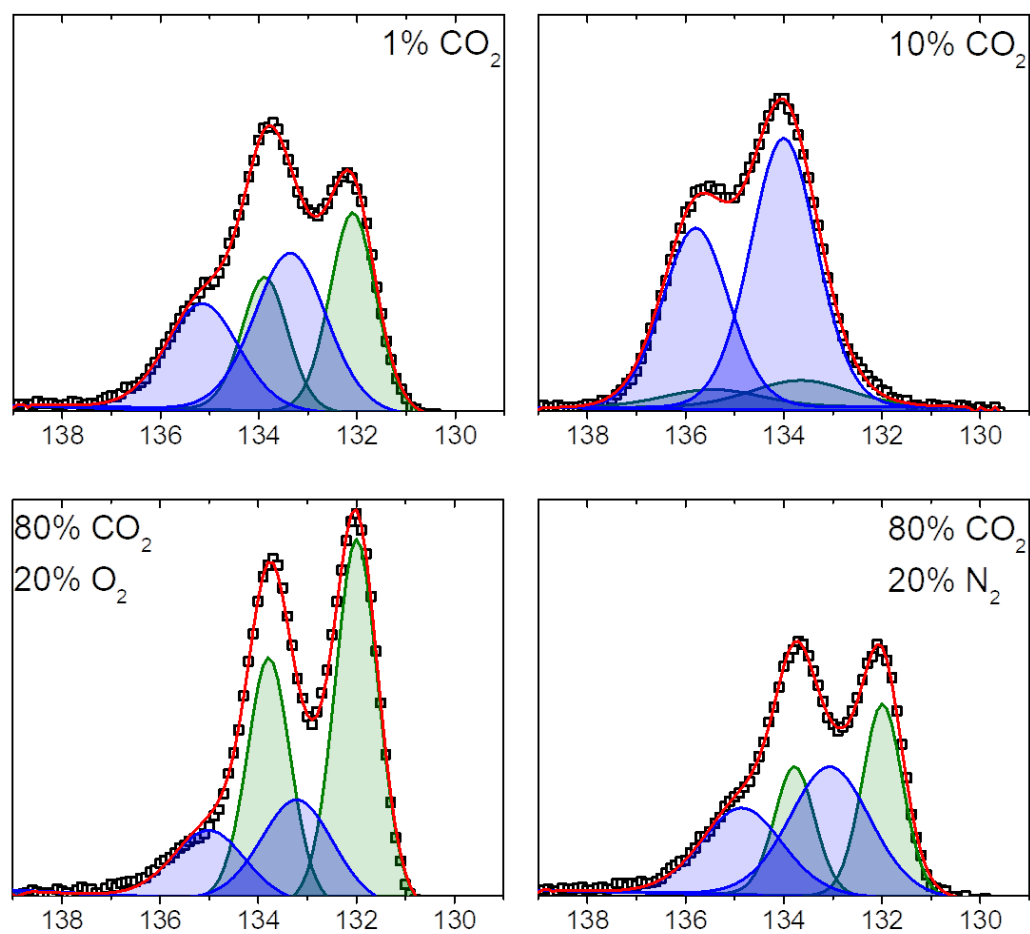

**Fig. S5** CO<sub>2</sub> Effects on Surface Chemistry of LSCF. XPS of Sr 3d spectra in different CO<sub>2</sub> environments. LSCF samples were aged at 700°C for 25 hours in the listed environment. LSCF lattice Sr peaks are shown in green and surface segregated Sr peaks are shown in blue.

| Peak Class                    | Unaged | 1% O <sub>2</sub> | 20% O <sub>2</sub> | 50% O <sub>2</sub> | 100% O <sub>2</sub> | 1% CO <sub>2</sub> | 10% CO <sub>2</sub> | 80% CO <sub>2</sub><br>20% O <sub>2</sub> | 80% CO <sub>2</sub><br>20% N <sub>2</sub> |
|-------------------------------|--------|-------------------|--------------------|--------------------|---------------------|--------------------|---------------------|-------------------------------------------|-------------------------------------------|
| Sr3d <sub>5/2</sub> - Surface | 1.00   | 1.33              | 1.86               | 1.79               | 1.03                | 1.69               | 2.63                | 1.12                                      | 1.54                                      |
| Sr3d <sub>5/2</sub> - Bulk    | 1.00   | 1.96              | 0.66               | 0.59               | 1.43                | 1.36               | 0.38                | 2.34                                      | 1.15                                      |

**Fig. S6** Figure S6. Table of XPS spectra values of the area under each curve, normalized to Sr3d<sub>5/2</sub> – Bulk peak intensity.

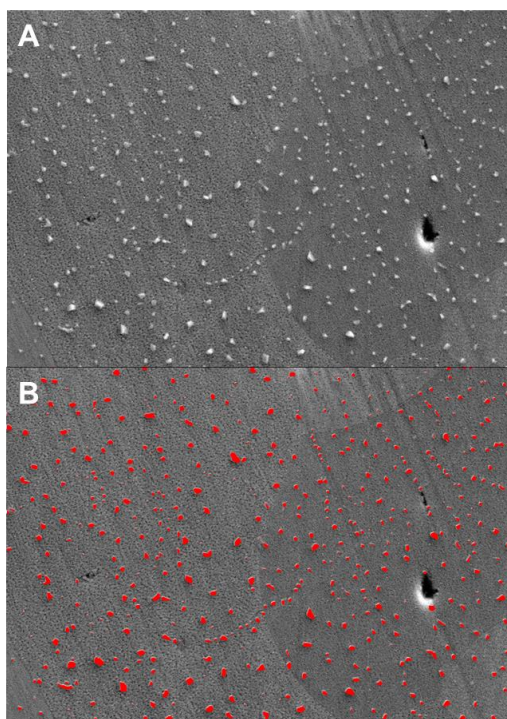

**Fig. S7** Overview of procedure for using Trainable WEKA segmentation in ImageJ to determine particle size distribution (a) original image (b) surface particles identified by Trainable WEKA highlighted in original image.
